# Supplementary material for: Auxiliary-lag Dependent Gaussian Process Model for Forecasting Using Proposed Kernels and Multi-start Optimization Method
Source: Research Square preprint supplement (doi:10.21203/rs.3.rs-6888051/v1), 2025-07-21
Supplement: Supplementary file 1 [file 599c476c8e5119109e09cd95.docx]

**Supplementary Material (S1)**

**Heat plot of covariance matric of Data, Prior and Posterior, ALD-GP for different kernels at different lags using rainfall data.**

| 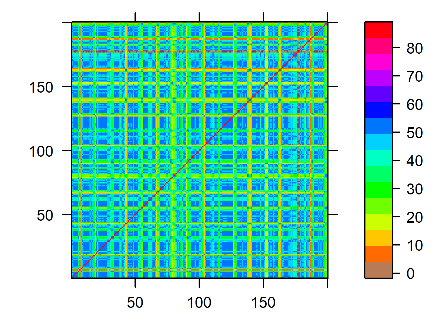 | 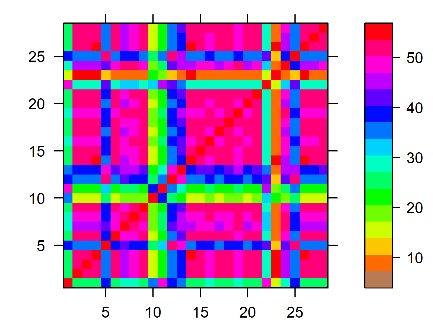 | 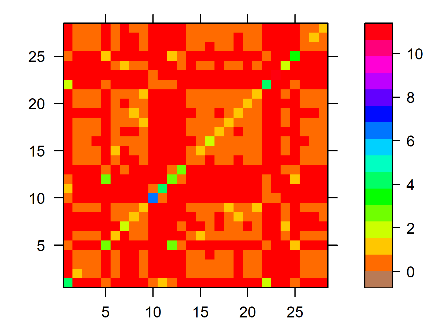 |
| --- | --- | --- |
| (a) | (b) | (c) |

Figure S1 Covariance matrix of ALD-GP using SE kernel at One lag for rainfall data. (a) covariance matrix of train data. (b) covariance matrix of prior ALD-GP. (c) covariance matrix of posterior ALD-GP.

| 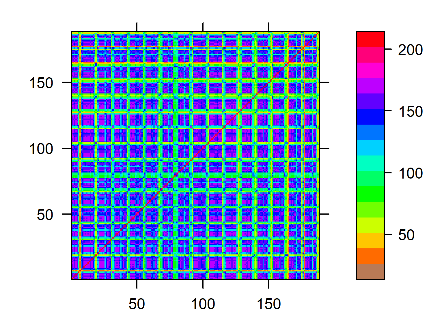 | 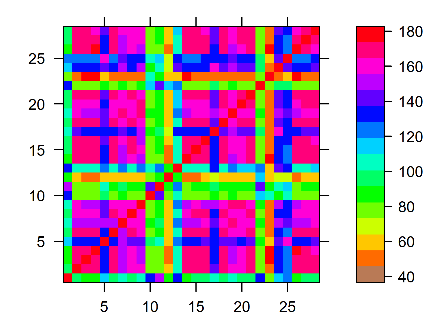 | 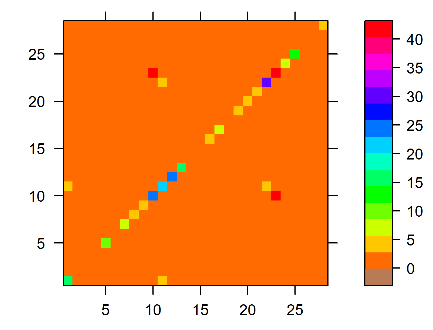 |
| --- | --- | --- |
| (a) | (b) | (c) |

Figure S2 Covariance matrix of ALD-GP using SE kernel at Two lags for rainfall data. (a) covariance matrix of train data. (b) covariance matrix of prior ALD-GP. (c) covariance matrix of posterior ALD-GP.

| 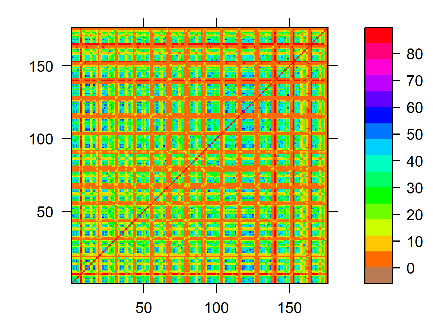 | 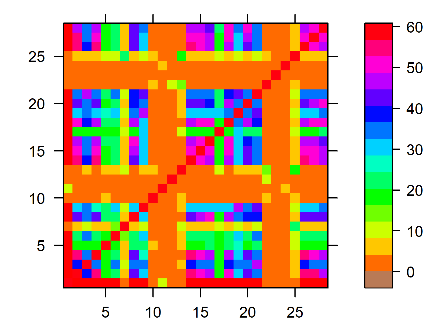 | 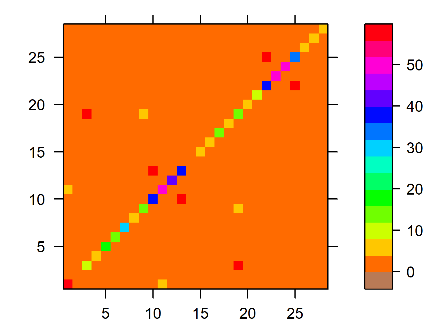 |
| --- | --- | --- |
| (a) | (b) | (c) |

Figure S3 Covariance matrix of ALD-GP using SE kernel at Three lags for rainfall data. (a) covariance matrix of train data. (b) covariance matrix of prior ALD-GP. (c) covariance matrix of posterior ALD-GP.

| 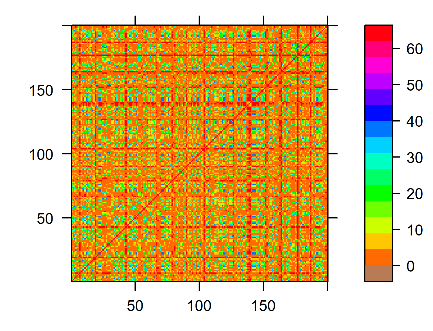 | 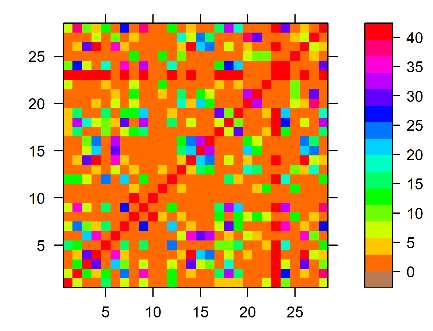 | 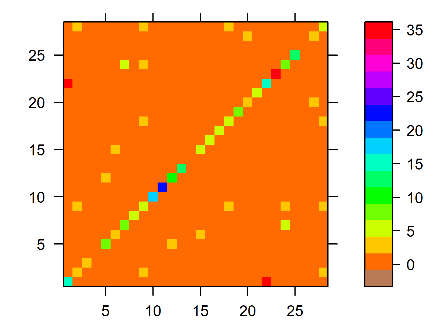 |
| --- | --- | --- |
| (a) | (b) | (c) |

Figure S4 Covariance matrix of ALD-GP using SEP kernel at One lag for rainfall data. (a) covariance matrix of train data. (b) covariance matrix of prior ALD-GP. (c) covariance matrix of posterior ALD-GP.

| 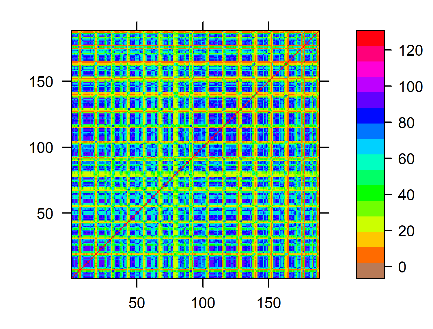 | 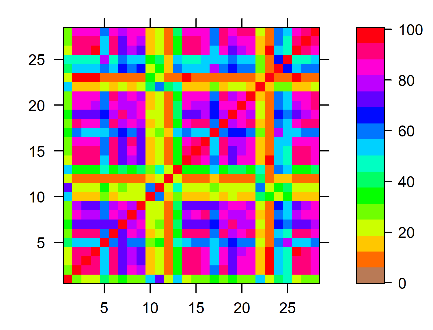 | 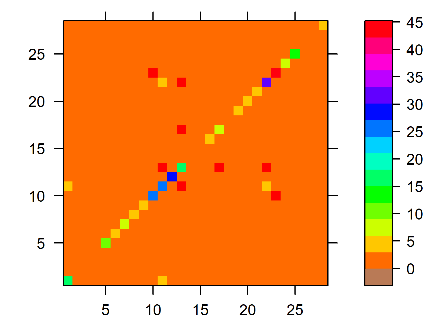 |
| --- | --- | --- |
| (a) | (b) | (c) |

Figure S5 Covariance matrix of ALD-GP using SEP kernel at Two lags for rainfall data. (a) covariance matrix of train data. (b) covariance matrix of prior ALD-GP. (c) covariance matrix of posterior ALD-GP.

| 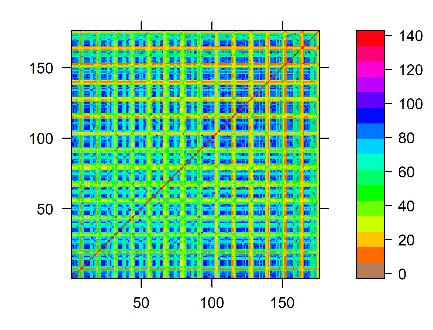 | 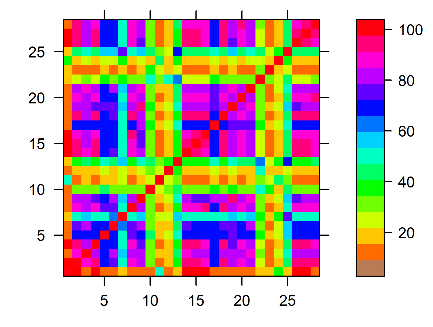 | 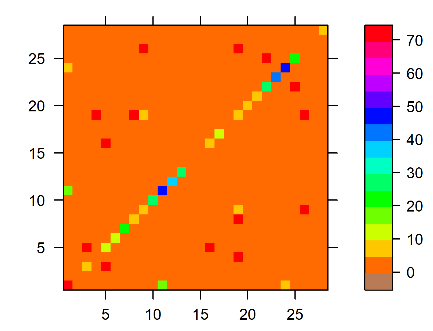 |
| --- | --- | --- |
| (a) | (b) | (c) |

Figure S6 Covariance matrix of ALD-GP using SEP kernel at Three lags for rainfall data. (a) covariance matrix of train data. (b) covariance matrix of prior ALD-GP. (c) covariance matrix of posterior ALD-GP.

| 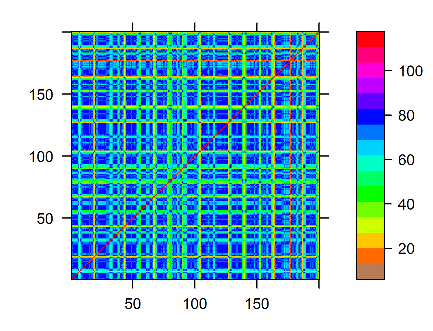 | 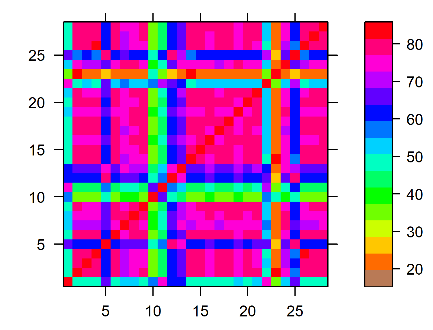 | 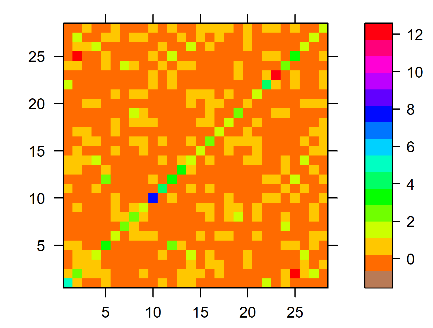 |
| --- | --- | --- |
| (a) | (b) | (c) |

Figure S7 Covariance matrix of ALD-GP using SE+W kernel at One lag for rainfall data. (a) covariance matrix of train data. (b) covariance matrix of prior ALD-GP. (c) covariance matrix of posterior ALD-GP.

| 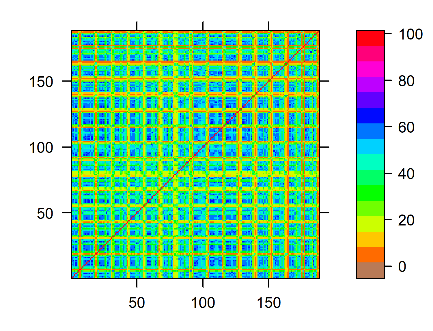 | 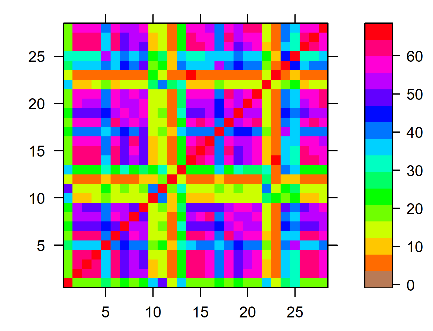 | 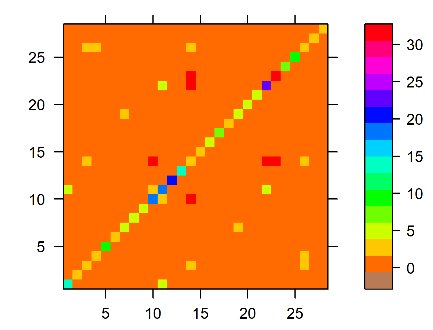 |
| --- | --- | --- |
| (a) | (b) | (c) |

Figure S8 Covariance matrix of ALD-GP using SE+W kernel at Two lags for rainfall data. (a) covariance matrix of train data. (b) covariance matrix of prior ALD-GP. (c) covariance matrix of posterior ALD-GP.

| 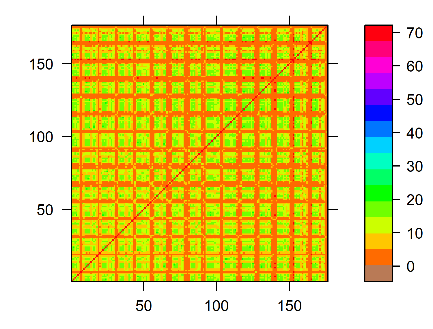 | 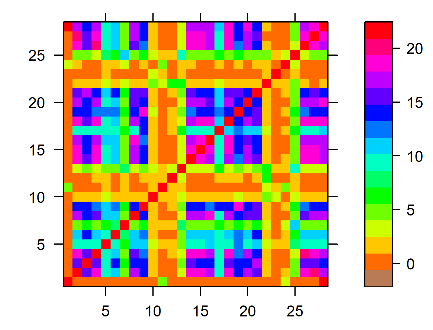 | 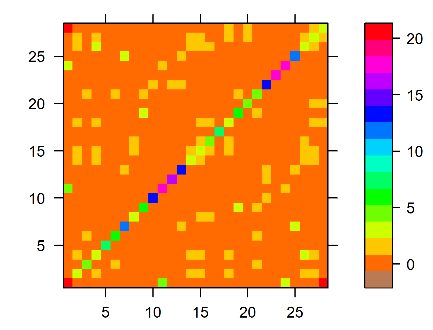 |
| --- | --- | --- |
| (a) | (b) | (c) |

Figure S9 Covariance matrix of ALD-GP using SE+W kernel at Three lags for rainfall data. (a) covariance matrix of train data. (b) covariance matrix of prior ALD-GP. (c) covariance matrix of posterior ALD-GP.

| 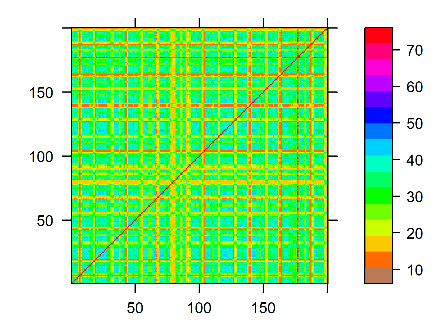 | 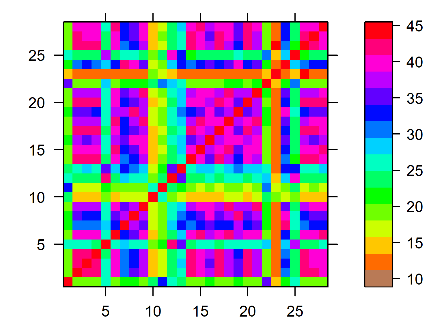 | 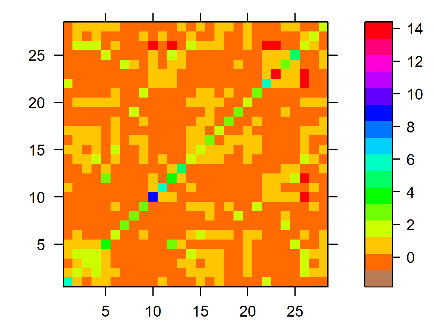 |
| --- | --- | --- |
| (a) | (b) | (c) |

Figure S10 Covariance matrix of ALD-GP using RQ+W kernel at One lag for rainfall data. (a) covariance matrix of train data. (b) covariance matrix of prior ALD-GP. (c) covariance matrix of posterior ALD-GP.

| 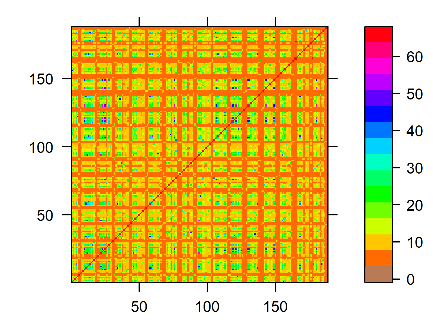 | 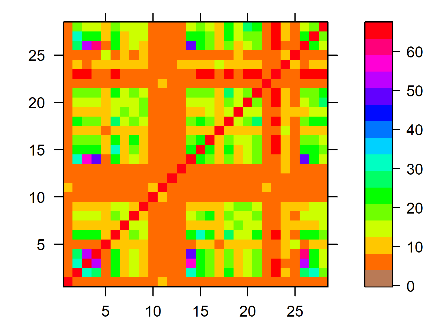 | 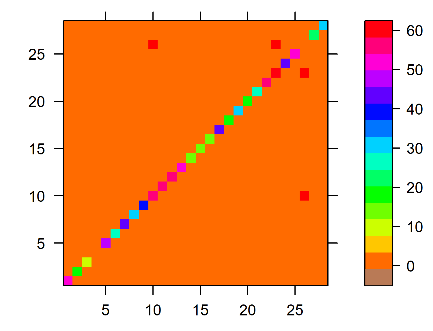 |
| --- | --- | --- |
| (a) | (b) | (c) |

Figure S11 Covariance matrix of ALD-GP using RQ+W kernel at Two lags for rainfall data. (a) covariance matrix of train data. (b) covariance matrix of prior ALD-GP. (c) covariance matrix of posterior ALD-GP.

| 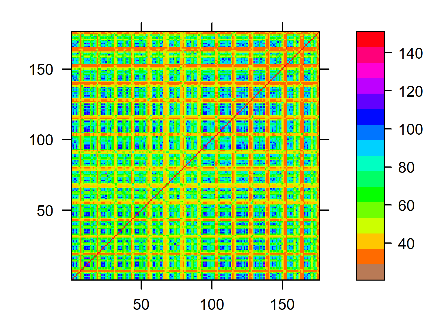 | 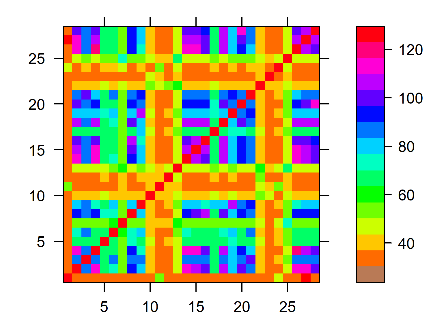 | 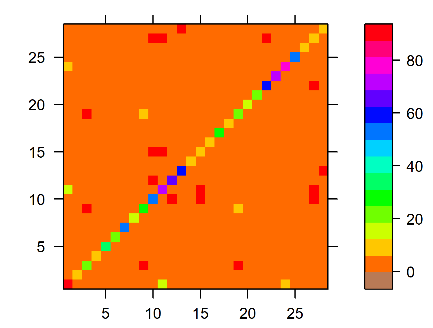 |
| --- | --- | --- |
| (a) | (b) | (c) |

Figure S12 Covariance matrix of ALD-GP using RQ+W kernel at Three lags for rainfall data. (a) covariance matrix of train data. (b) covariance matrix of prior ALD-GP. (c) covariance matrix of posterior ALD-GP.

| 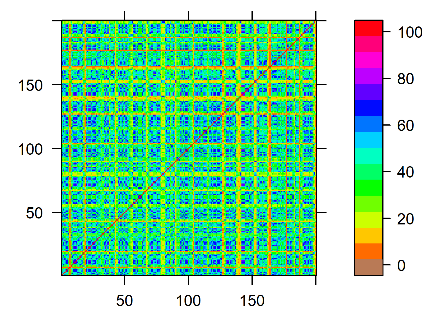 | 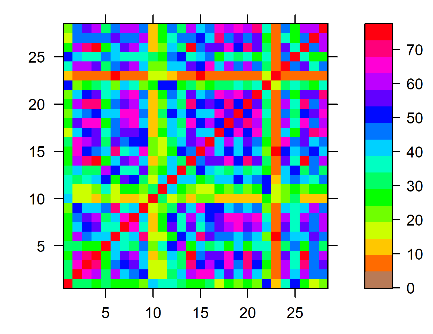 | 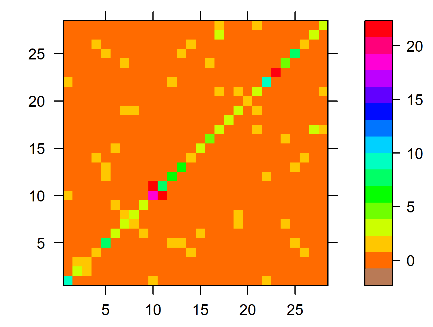 |
| --- | --- | --- |
| (a) | (b) | (c) |

Figure S13 Covariance matrix of ALD-GP using P×SE+M2 kernel at One lag for rainfall data. (a) covariance matrix of train data. (b) covariance matrix of prior ALD-GP. (c) covariance matrix of posterior ALD-GP.

| 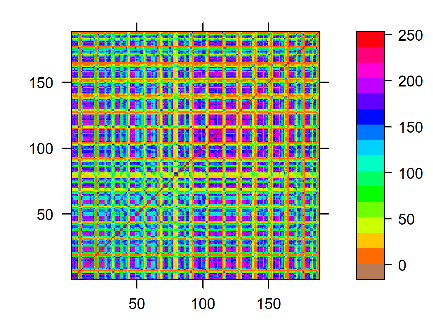 | 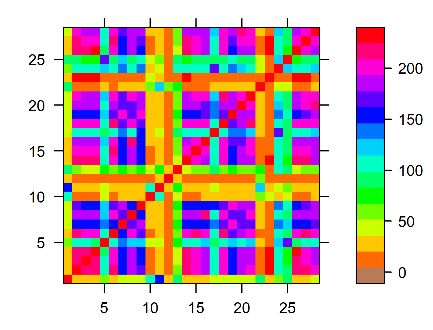 | 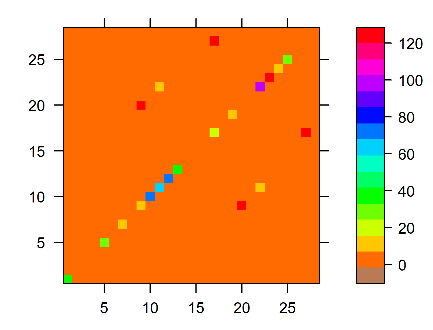 |
| --- | --- | --- |
| (a) | (b) | (c) |

Figure S14 Covariance matrix of ALD-GP using P×SE+M2 kernel at Two lags for rainfall data. (a) covariance matrix of train data. (b) covariance matrix of prior ALD-GP. (c) covariance matrix of posterior ALD-GP.

| 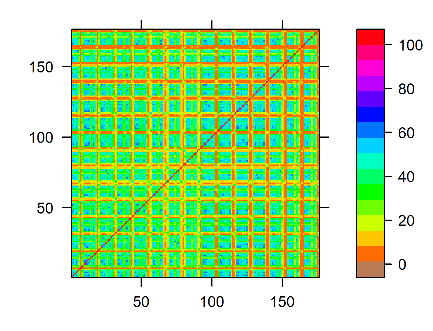 | 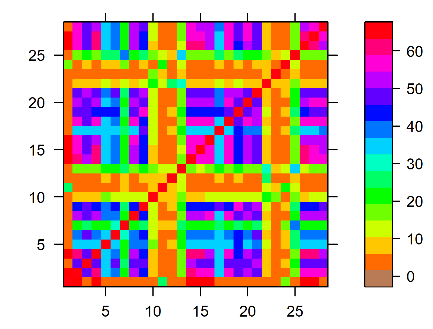 | 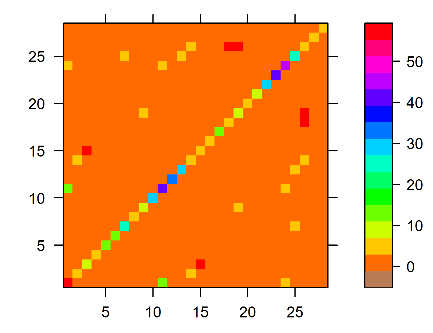 |
| --- | --- | --- |
| (a) | (b) | (c) |

Figure S15 Covariance matrix of ALD-GP using P×SE+M2 kernel at Three lags for rainfall data. (a) covariance matrix of train data. (b) covariance matrix of prior ALD-GP. (c) covariance matrix of posterior ALD-GP.

| 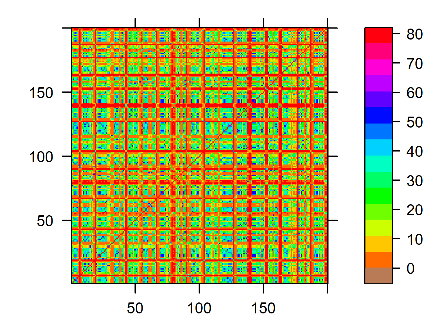 | 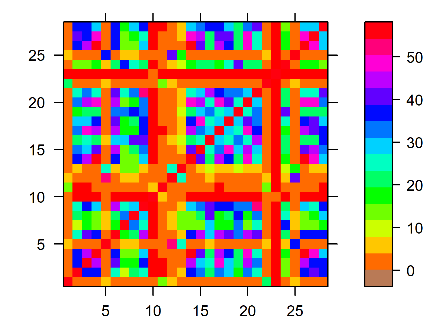 | 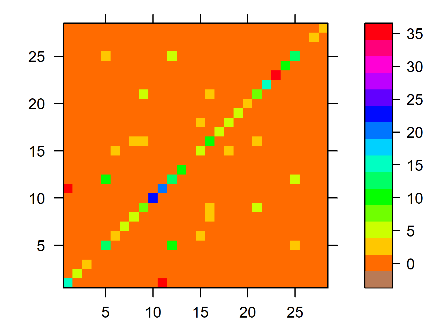 |
| --- | --- | --- |
| (a) | (b) | (c) |

Figure S16 Covariance matrix of ALD-GP using SSEP kernel at One lag for rainfall data. (a) covariance matrix of train data. (b) covariance matrix of prior ALD-GP. (c) covariance matrix of posterior ALD-GP.

| 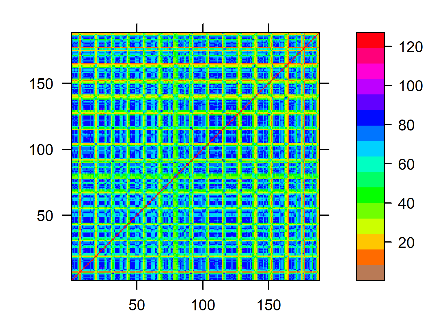 | 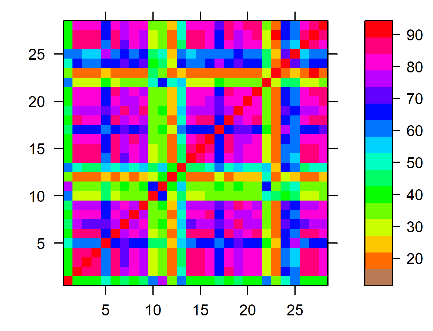 | 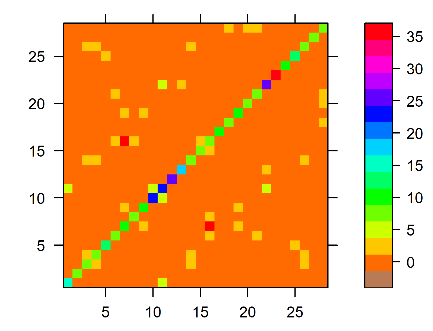 |
| --- | --- | --- |
| (a) | (b) | (c) |

Figure S17 Covariance matrix of ALD-GP using SSEP kernel at Two lags for rainfall data. (a) covariance matrix of train data. (b) covariance matrix of prior ALD-GP. (c) covariance matrix of posterior ALD-GP.

| 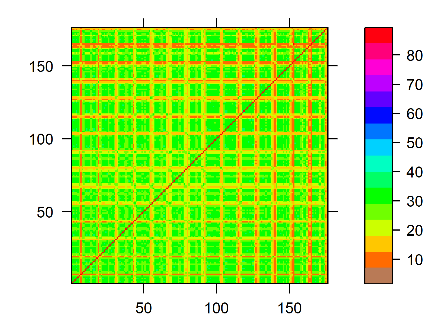 | 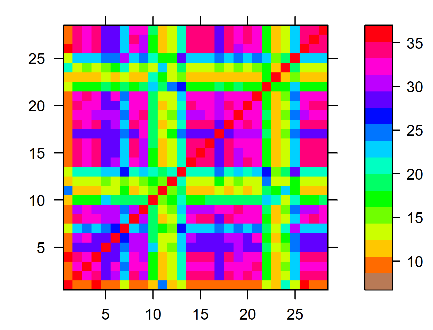 | 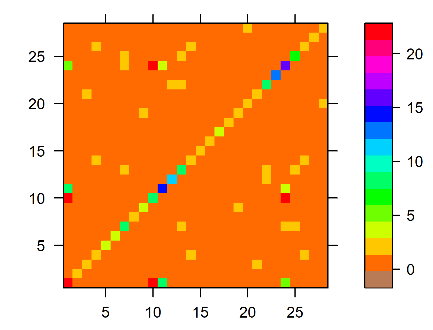 |
| --- | --- | --- |
| (a) | (b) | (c) |

Figure S18 Covariance matrix of ALD-GP using SSEP kernel at Three lags for rainfall data. (a) covariance matrix of train data. (b) covariance matrix of prior ALD-GP. (c) covariance matrix of posterior ALD-GP.

| 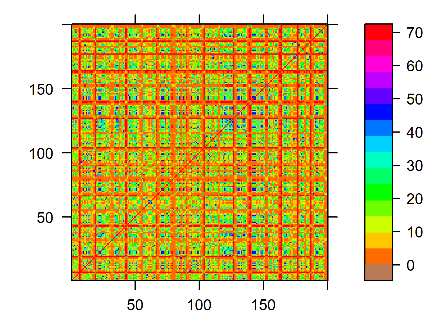 | 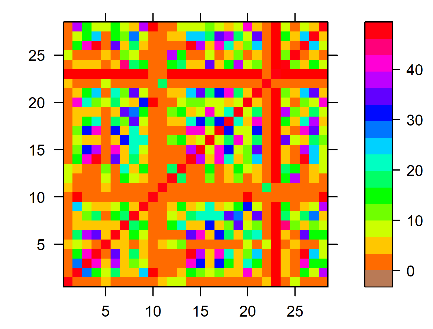 | 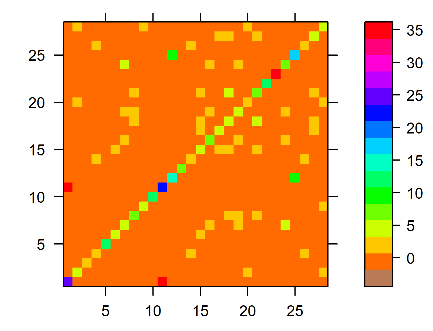 |
| --- | --- | --- |
| (a) | (b) | (c) |

Figure S19 Covariance matrix of ALD-GP using SESP kernel at One lag for rainfall data. (a) covariance matrix of train data. (b) covariance matrix of prior ALD-GP. (c) covariance matrix of posterior ALD-GP.

| 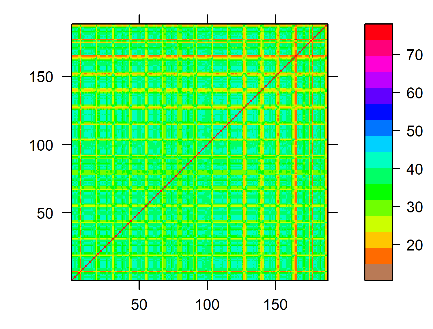 | 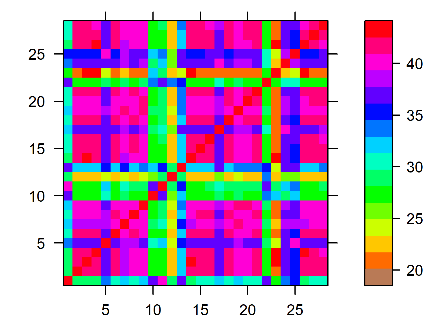 | 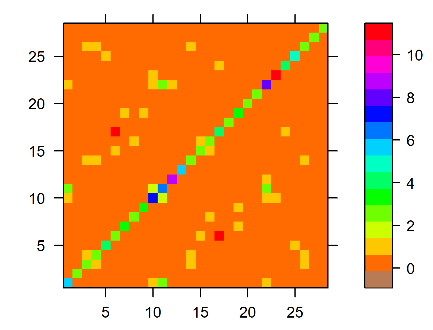 |
| --- | --- | --- |
| (a) | (b) | (c) |

Figure S20 Covariance matrix of ALD-GP using SESP kernel at Two lags for rainfall data. (a) covariance matrix of train data. (b) covariance matrix of prior ALD-GP. (c) covariance matrix of posterior ALD-GP.

| 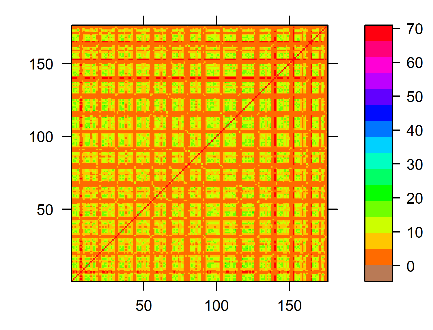 | 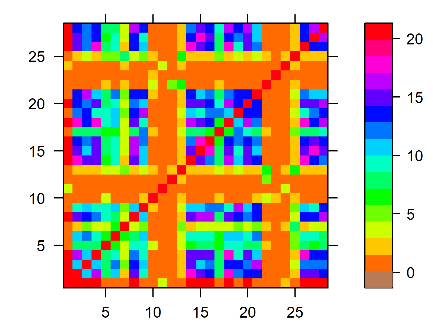 | 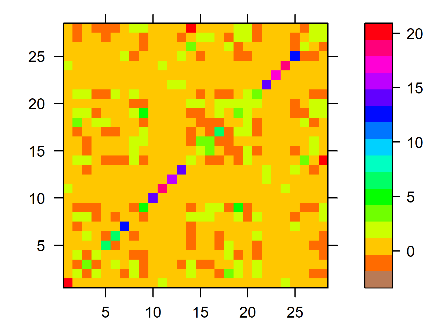 |
| --- | --- | --- |
| (a) | (b) | (c) |

Figure S21 Covariance matrix of ALD-GP using SESP kernel at Three lags for rainfall data. (a) covariance matrix of train data. (b) covariance matrix of prior ALD-GP. (c) covariance matrix of posterior ALD-GP.

| 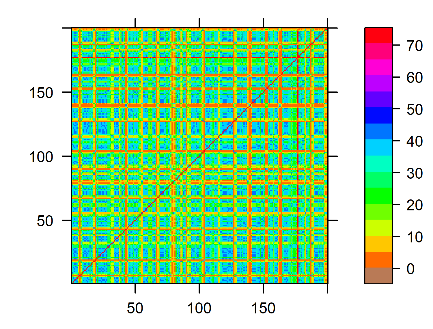 | 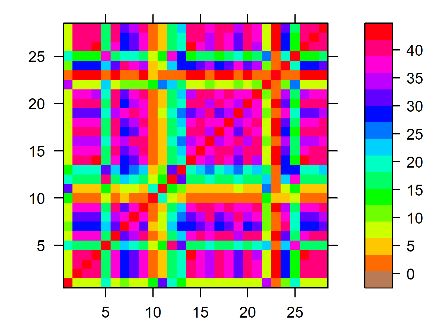 | 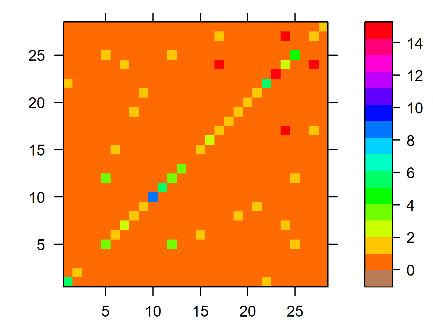 |
| --- | --- | --- |
| (a) | (b) | (c) |

Figure S22 Covariance matrix of ALD-GP using 2SEP kernel at One lag for rainfall data. (a) covariance matrix of train data. (b) covariance matrix of prior ALD-GP. (c) covariance matrix of posterior ALD-GP.

| 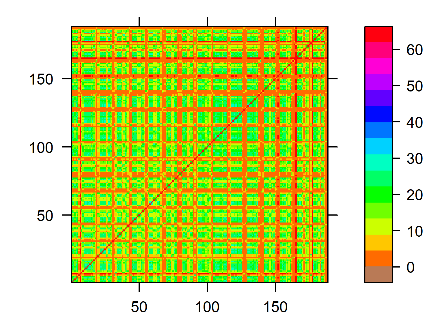 | 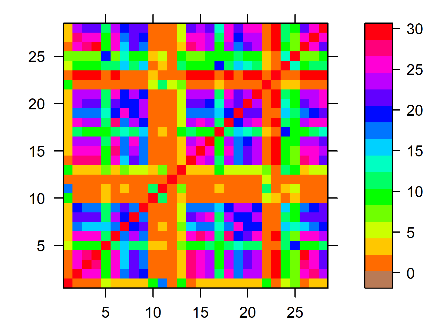 | 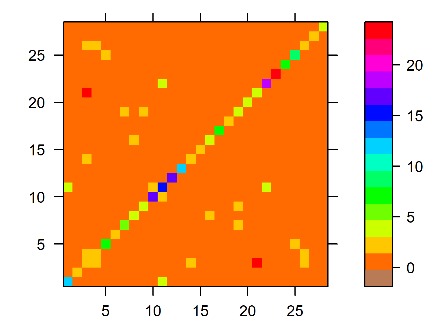 |
| --- | --- | --- |
| (a) | (b) | (c) |

Figure S23 Covariance matrix of ALD-GP using 2SEP kernel at Two lags for rainfall data. (a) covariance matrix of train data. (b) covariance matrix of prior ALD-GP. (c) covariance matrix of posterior ALD-GP.

| 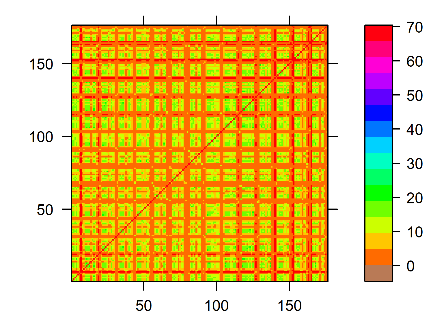 | 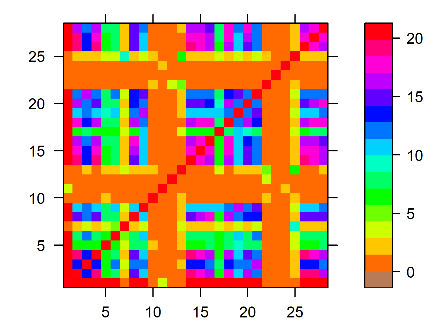 | 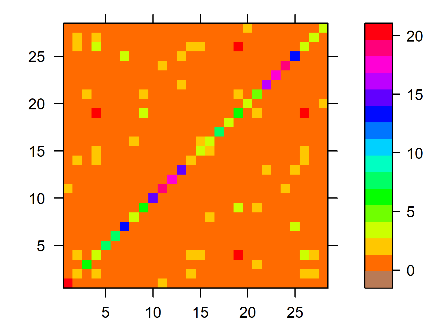 |
| --- | --- | --- |
| (a) | (b) | (c) |

Figure S24 Covariance matrix of ALD-GP using 2SEP kernel at Three lags for rainfall data. (a) covariance matrix of train data. (b) covariance matrix of prior ALD-GP. (c) covariance matrix of posterior ALD-GP.
